# Supplementary material
Source: PubMed Central journal article supplement (PMC3180803)
Supplement: supp_tpc.111.087973_Hippler_Supplemental_Data_final.pdf [file supp_tpc.111.087973_Hippler_Supplemental_Data_final.pdf]

## Supplemental Figure 1

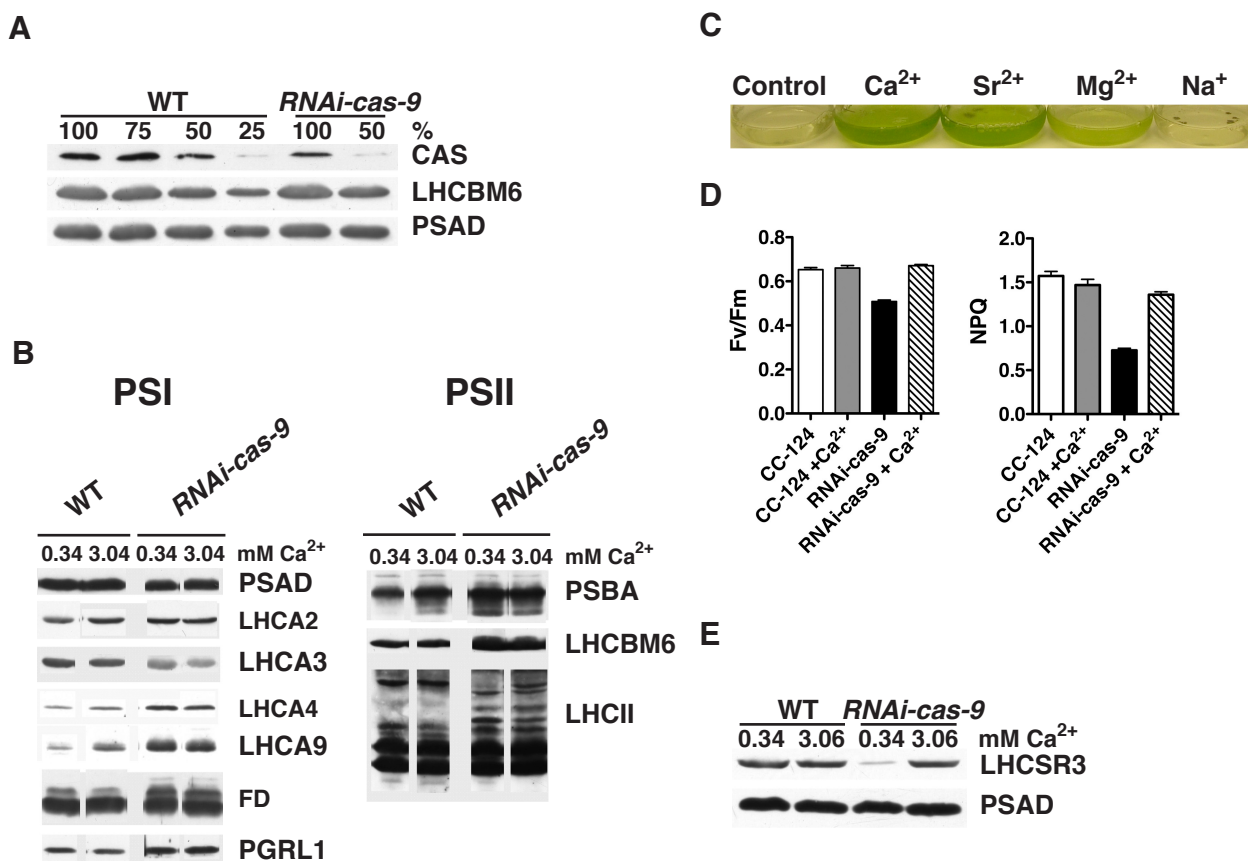

Analysis of the HL response of the *cas-kd* line *RNAi-cas-9*

(A) Quantification of CAS amounts in thylakoids isolated from WT (CC-124) and *RNAi-cas-9*, grown in TAP under LL, upon SDS PAGE fractionation and immunoblot analysis (100% equals 5  $\mu\text{g}$  of chlorophyll per lane; LHCBM6 and PSAD signals served as loading controls).

(B) Quantification of PSI and PSII subunits in WT (CC-124) and *RNAi-cas-9* grown under LL in TAP containing 0.34 or 3.06 mM  $\text{CaCl}_2$ . Five  $\mu\text{g}$  of chlorophyll of whole cell extracts were fractionated on a 13% SDS-PAGE and PSAD, LHCA2, LHCA3, LHCA4, LHCA9, FD, PGRL1 (for PSI), PSBA, LHCBM6 and P25K (for PSII) abundance were analyzed by immunoblot. CF1 signal served as a loading control whereas P25K is a polyclonal antibody against LHCII proteins.

(C) *RNAi-cas-9* strain after 24 h under HL in TAP. Cultures were supplemented with 3.06 mM of the indicated ion in the form of its chloride salt. Control contains standard concentration of 0.34 mM  $\text{CaCl}_2$ . Starting cell density of the cultures was  $1 \times 10^6$  cells/mL.

(D)  $F_v/F_m$  and maximal NPQ in WT (CC-124) and in *RNAi-cas-9*. Cells were grown in TAP under LL and then exposed for 16 h under HL in HSM containing 0.34 or 3.06 mM  $\text{CaCl}_2$ . Black bar = dark, white bar =  $800 \mu\text{Em}^{-2}\text{s}^{-1}$ . Values plotted are the means of three samples  $\pm$  standard deviation, PAR stands for photosynthetic active radiation.

(E) Quantification of LHCSR3 amounts in WT (CC-124) and *RNAi-cas-9*. Cells were grown in TAP under LL and then shifted for 24 h under HL ( $200 \mu\text{Em}^{-2}\text{s}^{-1}$ ) in 80% HSM containing normal (0.34 mM) or high (3.06 mM)  $\text{CaCl}_2$  concentration. Five  $\mu\text{g}$  of chlorophyll of whole cell extracts were fractionated on a 13% SDS-PAGE and LHCSR3 abundance was analyzed by immunoblot. PSAD signal served as a loading control.

## Supplemental Figure 2

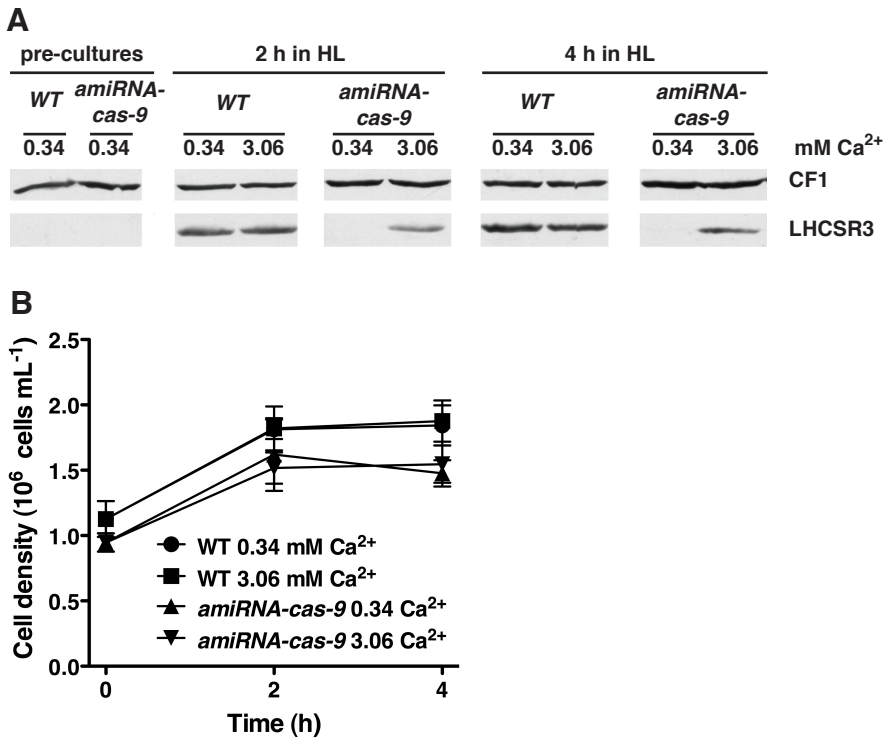

The differences in LHCSR3 expression between WT and *cas-kd* strains in 0.34 and 3.06 mM Ca<sup>2+</sup> are not due to altered growth.

(A) WT and *amiRNA-cas-9* cells were shifted from LL TAP to HL 80% HSM containing 0.34 or 3.06 mM Ca<sup>2+</sup>. Whole cell extracts of samples were taken at 0, 2 and 4h were fractionated on a 13% SDS-PAGE and LHCSR3 and CF1 abundances were analyzed by immunoblot. CF1 signal served as a loading control.

(B) Cell densities of WT and *amiRNA-cas-9* cultures from the experiment described above (Figure S2A). The values are the means  $\pm$  S.D. of three cell counts.

## Supplemental Figure 3

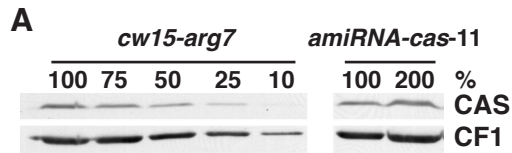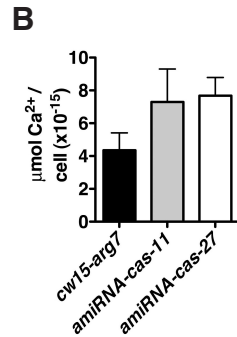

Down-regulation of CAS does not lead to a decrease in cellular calcium content in *amiRNA-cas-11* and *amiRNA-cas-27*.

(A) Quantification of CAS amounts in thylakoids isolated from WT (*cw15-arg7*) and *amiRNA-cas-11*, grown in TAP under LL, upon SDS-PAGE fractionation and immunoblot analysis (100% equals 4 μg of chlorophyll per lane; CF1 signal served as loading control).

(B) Calcium content of the *cas-kd* strains *amiRNA-cas-11* and *amiRNA-cas-27* compared with their WT background *cw15-arg7* as assessed by ion chromatography (IC). Data are presented on cell basis. The values are the means ± S.D. of three biological samples. The differences displayed in the graph are statistically not significant (paired t-test, 95% confidence level).

## Supplemental Figure 4

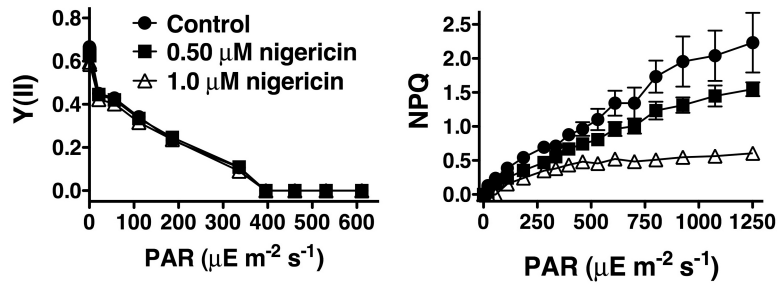

Nigericin at 1  $\mu\text{M}$  selectively impacts NPQ but not photosynthetic electron transfer in WT cells (CC-124)

Irradiance dependence of quantum yield of PSII and NPQ of WT (CC-124) cells shifted from TAP medium in LL to 80% HSM medium HL for two hours in the presence or absence of nigericin. Values plotted are the means of three samples  $\pm$  standard deviation, PAR stands for photosynthetic active radiation.



## Supplemental Figure 5

A

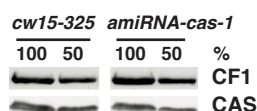

B

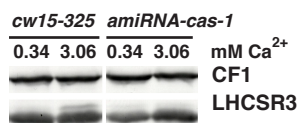

C

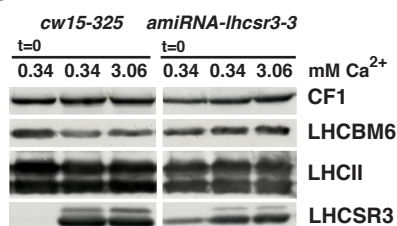

Characterization of *amiRNA-cas-1* and *amiRNA-lhcsr3-3* strains.

(A) Quantification of CAS amounts in thylakoids isolated from WT (*cw15-325*) and *amiRNA-cas-1* grown under LL in TAP-NO<sub>3</sub> (amiRNA expression activated) upon SDS-PAGE fractionation and immunoblot analysis (100% equals 70 μg of protein per lane; CF1 signal served as loading control). Densitometric analyses showed that CAS levels in *amiRNA-cas-1* are 40% down compared to the WT levels.

(B) Quantification of LHCSR3 amounts in whole cell extracts of WT (*cw15-325*) and *amiRNA-cas-1* upon SDS-PAGE fractionation and immunoblot analysis (100% equals 2.5 μg of chlorophyll per lane; CF1 signal served as loading control). WT and *amiRNA-cas-1* were initially shifted from LL TAP-NH<sub>4</sub> to LL TAP-NO<sub>3</sub> for 40 h to activate the amiRNA expression and subsequently shifted for 24 h to HL in either HSM-NH<sub>4</sub> or HSM-NO<sub>3</sub> containing 0.34 or 3.06 mM Ca<sup>2+</sup>.

(C) Quantification of LHCSR3, LHCBM6 and LHCII amounts in whole cell extracts of WT (*cw15-325*) and *amiRNA-lhcsr3-3* upon SDS-PAGE fractionation and immunoblot analysis (100% equals 2.5 μg of chlorophyll per lane; CF1 signal served as loading control). WT and *amiRNA-lhcsr3-2* were initially shifted from LL TAP-NH<sub>4</sub> to LL TAP-NO<sub>3</sub> for 40 h to activate the amiRNA expression and subsequently shifted for 2 h to HL in either HSM-NH<sub>4</sub> or HSM-NO<sub>3</sub> containing 0.34 or 3.06 mM Ca<sup>2+</sup>.

## Supplemental Figure 6

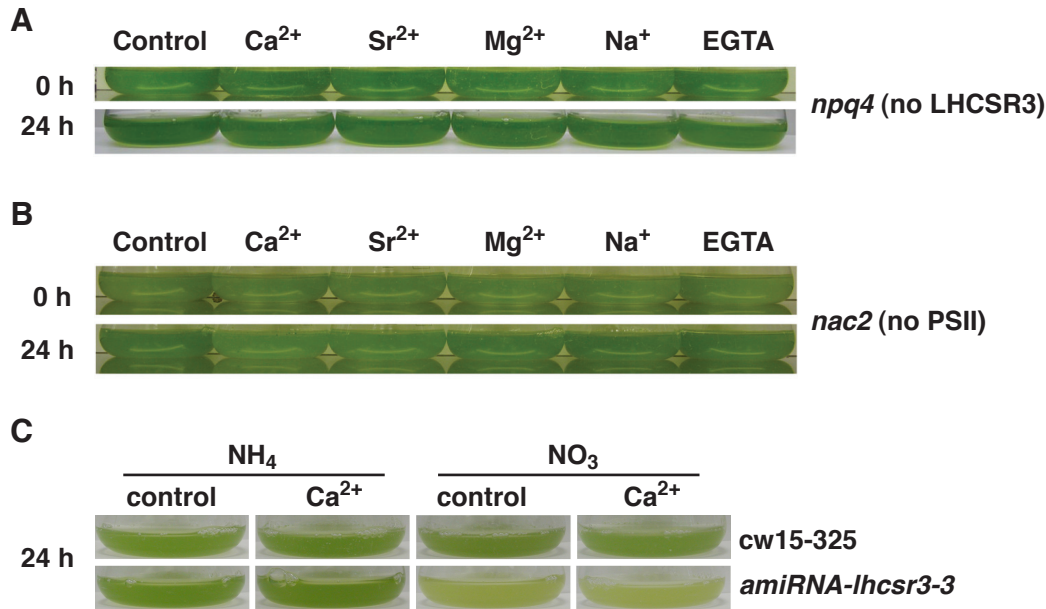

Growth phenotypes of *npq4*, *nac2* and *amiRNA-lhcsr3-3* after 24h in HL.

(A) *npq4* (LHCSR3 knock-out strain; Peers et al., 2009) and (B) *nac2* (PSII deficient mutant; (Kuchka et al, 1989)) 24 h after being shifted from LL TAP to HL 80% HSM with the addition of the indicated ions in their chloride salt form (final concentration 3.06 mM) or of EGTA (2 mM). Control contained 0.34mM Ca<sup>2+</sup>, 0.41 mM Mg<sup>2+</sup> and 0.27 mM Na<sup>+</sup>. Starting cell density of the cultures was 1x10<sup>6</sup> cells/mL.

(C) WT and *amiRNA-lhcsr3-3* were initially shifted from LL TAP-NH<sub>4</sub> to LL TAP-NO<sub>3</sub> for 40 h to activate the amiRNA expression and subsequently shifted for 24 h to HL in either HSM-NH<sub>4</sub> or HSM-NO<sub>3</sub> containing 0.34 or 3.06 mM Ca<sup>2+</sup>. Before exposure to HL the cultures were set to 2.5 µg chl/mL.

**Supplemental Table 1: Fm, Fo and Fv/Fm values of Figure 2D**

|       | <i>cw15-arg7</i> | <i>cw15-arg7</i>     | <i>amiRNA-cas-27</i> | <i>amiRNA-cas-27</i> |
|-------|------------------|----------------------|----------------------|----------------------|
|       | HL               | HL +Ca <sup>2+</sup> | HL                   | HL +Ca <sup>2+</sup> |
| Fm    | 0.190            | 0.191                | 0.065                | 0.075                |
|       | ±0.012           | ±0.011               | ±0.003               | ±0.003               |
| Fo    | 0.059            | 0.058                | 0.030                | 0.030                |
|       | ±0.004           | ±0.003               | ±0.001               | ±0.001               |
| Fv/Fm | 0.688            | 0.696                | 0.534                | 0.608                |
|       | ±0.003           | ±0.003               | ±0.005               | ±0.004               |

**Supplemental Table 2: Fm, Fo and Fv/Fm values of Figure 3E**

|       | CC-124 | <i>amiRNA-cas-9</i> | <i>amiRNA-cas-9</i> +Ca <sup>2+</sup> |
|-------|--------|---------------------|---------------------------------------|
| Fm    | 0.222  | 0.107               | 0.179                                 |
|       | ±0.09  | ±0.008              | ±0.008                                |
| Fo    | 0.059  | 0.054               | 0.047                                 |
|       | ±0.002 | ±0.004              | ±0.003                                |
| Fv/Fm | 0.735  | 0.495               | 0.735                                 |
|       | ±0.002 | ±0.010              | ±0.005                                |

**Supplemental Table 3: Fm, Fo and Fv/Fm values of Figures 6B, C**

|       | ctrl   | W7     | W7     | W7     | W7     | W5     | W5     | W5     |
|-------|--------|--------|--------|--------|--------|--------|--------|--------|
|       |        | 25 μM  | 50 μM  | 75 μM  | 100 μM | 50 μM  | 75 μM  | 100 μM |
| Fm    | 0.091  | 0.079  | 0.073  | 0.042  | 0.035  | 0.097  | 0.092  | 0.088  |
|       | ±0.011 | ±0.005 | ±0.006 | ±0.002 | ±0.003 | ±0.002 | ±0.001 | ±0.003 |
| Fo    | 0.033  | 0.031  | 0.032  | 0.035  | 0.034  | 0.034  | 0.032  | 0.033  |
|       | ±0.004 | ±0.002 | ±0.003 | ±0.001 | ±0.003 | ±0.000 | ±0.000 | ±0.001 |
| Fv/Fm | 0.639  | 0.605  | 0.563  | 0.157  | 0.055  | 0.652  | 0.646  | 0.631  |
|       | ±0.002 | ±0.002 | ±0.008 | ±0.008 | ±0.004 | ±0.007 | ±0.001 | ±0.004 |

**Supplemental Table 4: Fm, Fo and Fv/Fm values of Figures 6E, F**

|       | Ctrl                 | W7<br>50 $\mu$ M     | W7<br>75 $\mu$ M     |
|-------|----------------------|----------------------|----------------------|
| Fm    | 0.075<br>$\pm 0.006$ | 0.070<br>$\pm 0.004$ | 0.052<br>$\pm 0.002$ |
| Fo    | 0.029<br>$\pm 0.002$ | 0.029<br>$\pm 0.002$ | 0.030<br>$\pm 0.000$ |
| Fv/Fm | 0.614<br>$\pm 0.002$ | 0.586<br>$\pm 0.009$ | 0.441<br>$\pm 0.028$ |

**Supplemental Table 5: Fm, Fo and Fv/Fm values of Figures 6H, I**

|       | ctrl                 | 1 $\mu$ M mas        | 2 $\mu$ M mas        | 2 $\mu$ M maS17      |
|-------|----------------------|----------------------|----------------------|----------------------|
| Fm    | 0.126<br>$\pm 0.005$ | 0.076<br>$\pm 0.003$ | 0.035<br>$\pm 0.002$ | 0.158<br>$\pm 0.007$ |
| Fo    | 0.044<br>$\pm 0.002$ | 0.038<br>$\pm 0.001$ | 0.029<br>$\pm 0.002$ | 0.052<br>$\pm 0.003$ |
| Fv/Fm | 0.650<br>$\pm 0.003$ | 0.501<br>$\pm 0.007$ | 0.164<br>$\pm 0.027$ | 0.671<br>$\pm 0.003$ |

**Supplemental Table 6: Fm, Fo and Fv/Fm values of Figures 8B, C**

|              | WT<br>NH <sub>4</sub> | WT<br>NH <sub>4</sub><br>+Ca <sup>2+</sup> | WT<br>NO <sub>3</sub> | WT<br>NO <sub>3</sub><br>+Ca <sup>2+</sup> | <i>amiRNA-</i><br><i>cas-1</i> NH <sub>4</sub> | <i>amiRNA-</i><br><i>cas-1</i> NH <sub>4</sub><br>+Ca <sup>2+</sup> | <i>amiRNA-</i><br><i>cas-1</i> NO <sub>3</sub> | <i>amiRNA-</i><br><i>cas-1</i> NO <sub>3</sub><br>+Ca <sup>2+</sup> | <i>amiRNA-</i><br><i>cas-6</i> NH <sub>4</sub> | <i>amiRNA-</i><br><i>cas-6</i> NH <sub>4</sub><br>+Ca <sup>2+</sup> | <i>amiRNA-</i><br><i>cas-6</i> NO <sub>3</sub> | <i>amiRNA-</i><br><i>cas-6</i> NO <sub>3</sub><br>+Ca <sup>2+</sup> |
|--------------|-----------------------|--------------------------------------------|-----------------------|--------------------------------------------|------------------------------------------------|---------------------------------------------------------------------|------------------------------------------------|---------------------------------------------------------------------|------------------------------------------------|---------------------------------------------------------------------|------------------------------------------------|---------------------------------------------------------------------|
| <b>Fm</b>    | 0.180<br>$\pm 0.013$  | 0.156<br>$\pm 0.002$                       | 0.176<br>$\pm 0.005$  | 0.151<br>$\pm 0.005$                       | 0.168<br>$\pm 0.004$                           | 0.143<br>$\pm 0.002$                                                | 0.123<br>$\pm 0.004$                           | 0.185<br>$\pm 0.011$                                                | 0.145<br>$\pm 0.006$                           | 0.151<br>$\pm 0.003$                                                | 0.140<br>$\pm 0.005$                           | 0.162<br>$\pm 0.013$                                                |
| <b>Fo</b>    | 0.050<br>$\pm 0.002$  | 0.043<br>$\pm 0.000$                       | 0.048<br>$\pm 0.002$  | 0.044<br>$\pm 0.001$                       | 0.046<br>$\pm 0.001$                           | 0.040<br>$\pm 0.000$                                                | 0.039<br>$\pm 0.001$                           | 0.051<br>$\pm 0.002$                                                | 0.040<br>$\pm 0.001$                           | 0.040<br>$\pm 0.000$                                                | 0.038<br>$\pm 0.001$                           | 0.044<br>$\pm 0.004$                                                |
| <b>Fv/Fm</b> | 0.724<br>$\pm 0.006$  | 0.726<br>$\pm 0.006$                       | 0.729<br>$\pm 0.007$  | 0.709<br>$\pm 0.001$                       | 0.724<br>$\pm 0.001$                           | 0.721<br>$\pm 0.001$                                                | 0.686<br>$\pm 0.001$                           | 0.725<br>$\pm 0.005$                                                | 0.725<br>$\pm 0.006$                           | 0.732<br>$\pm 0.003$                                                | 0.729<br>$\pm 0.002$                           | 0.729<br>$\pm 0.004$                                                |

**Supplemental Table 7: Fm, Fo and Fv/Fm values of Figures 9B, C**

|              | WT<br>NH <sub>4</sub> | WT<br>NH <sub>4</sub><br>+Ca <sup>2+</sup> | WT<br>NO <sub>3</sub> | WT<br>NO <sub>3</sub><br>+Ca <sup>2+</sup> | <i>amiRNA-<br/>lhcsr3-2</i><br>NH <sub>4</sub> | <i>amiRNA-<br/>lhcsr3-2</i><br>NH <sub>4</sub><br>+Ca <sup>2+</sup> | <i>amiRNA-<br/>lhcsr3-2</i><br>NO <sub>3</sub> | <i>amiRNA-<br/>lhcsr3-2</i><br>NO <sub>3</sub><br>+Ca <sup>2+</sup> | <i>amiRNA-<br/>lhcsr3-3</i><br>NH <sub>4</sub> | <i>amiRNA-<br/>lhcsr3-3</i><br>NH <sub>4</sub><br>+Ca <sup>2+</sup> | <i>amiRNA-<br/>lhcsr3-3</i><br>NO <sub>3</sub> | <i>amiRNA-<br/>lhcsr3-3</i><br>NO <sub>3</sub><br>+Ca <sup>2+</sup> |
|--------------|-----------------------|--------------------------------------------|-----------------------|--------------------------------------------|------------------------------------------------|---------------------------------------------------------------------|------------------------------------------------|---------------------------------------------------------------------|------------------------------------------------|---------------------------------------------------------------------|------------------------------------------------|---------------------------------------------------------------------|
| <b>Fm</b>    | 0.123                 | 0.129                                      | 0.149                 | 0.157                                      | 0.145                                          | 0.150                                                               | 0.131                                          | 0.148                                                               | 0.187                                          | 0.189                                                               | 0.155                                          | 0.160                                                               |
|              | ±0.012                | ±0.007                                     | ±0.001                | ±0.001                                     | ±0.001                                         | ±0.008                                                              | ±0.016                                         | ±0.000                                                              | ±0.004                                         | ±0.000                                                              | ±0.008                                         | ±0.003                                                              |
| <b>Fo</b>    | 0.042                 | 0.041                                      | 0.049                 | 0.050                                      | 0.047                                          | 0.048                                                               | 0.066                                          | 0.076                                                               | 0.057                                          | 0.058                                                               | 0.063                                          | 0.064                                                               |
|              | ±0.003                | ±0.001                                     | ±0.001                | ±0.000                                     | ±0.001                                         | ±0.003                                                              | ±0.007                                         | ±0.000                                                              | ±0.001                                         | ±0.000                                                              | ±0.004                                         | ±0.002                                                              |
| <b>Fv/Fm</b> | 0.657                 | 0.682                                      | 0.673                 | 0.684                                      | 0.679                                          | 0.683                                                               | 0.494                                          | 0.488                                                               | 0.693                                          | 0.694                                                               | 0.597                                          | 0.601                                                               |
|              | ±0.010                | ±0.006                                     | ±0.009                | ±0.002                                     | ±0.008                                         | ±0.001                                                              | ±0.006                                         | ±0.001                                                              | ±0.002                                         | ±0.000                                                              | ±0.005                                         | ±0.004                                                              |

**Supplemental Table 8: Fm, Fo and Fv/Fm values of Supplemental Figure 4 online**

|              | ctrl   | 0.5 µM<br>nigericin | 1.0 µM<br>nigericin |
|--------------|--------|---------------------|---------------------|
| <b>Fm</b>    | 0.086  | 0.091               | 0.084               |
|              | ±0.005 | ±0.003              | ±0.002              |
| <b>Fo</b>    | 0.029  | 0.033               | 0.034               |
|              | ±0.001 | ±0.001              | ±0.001              |
| <b>Fv/Fm</b> | 0.665  | 0.639               | 0.597               |
|              | ±0.004 | ±0.005              | ±0.001              |
